# Supplementary material
Source: publisher site journal article supplement (https://www.dovepress.com/article/417449)

Supplemental Table 1: Prevalence of Anxiety Disorder and Depression by selected characteristics of long stay residents with Chronic Obstructive Pulmonary Disease living in US nursing homes in 2018 (n=239,615).

| Characteristics                               | n       | Prevalence of |            |
|-----------------------------------------------|---------|---------------|------------|
|                                               |         | Anxiety       | Depression |
| Co-Morbid Conditions                          |         |               |            |
| Dementia                                      | 115,198 | 38.9          | 60.6       |
| Coronary Artery Disease                       | 65,207  | 37.8          | 60.2       |
| Cerebrovascular Disease                       | 29,009  | 34.2          | 60.8       |
| Renal Insufficiency / End Stage Renal Disease | 47,378  | 35.8          | 57.6       |
| Hypertension                                  | 196,152 | 37.6          | 58.9       |
| Heart Failure                                 | 85,631  | 37.6          | 58.6       |
| Hyperlipidemia                                | 123,407 | 37.9          | 61.4       |
| Peripheral Vascular Disease                   | 37,669  | 36.4          | 60.0       |
| Atrial Fibrillation                           | 62,373  | 36.2          | 57.2       |
| Anemia                                        | 86,415  | 38.8          | 60.0       |
| Pneumonia                                     | 7,845   | 41.2          | 57.0       |
| Cancer                                        | 16,126  | 37.9          | 57.2       |
| Cirrhosis                                     | 2,295   | 39.6          | 60.4       |
| Diabetes mellitus                             | 99,655  | 36.0          | 59.5       |
| Gastroesophageal Reflux Disease/ Ulcer        | 111,167 | 41.9          | 63.2       |
| Osteoporosis                                  | 28,180  | 42.4          | 62.5       |
| Arthritis                                     | 74,331  | 41.7          | 62.5       |
| Fall history                                  | 47,034  | 41.5          | 62.7       |
| Urinary incontinence: Always continent        | 47,003  | 39.5          | 54.8       |
| Occasionally                                  | 44,315  | 38.6          | 58.0       |
| Frequently                                    | 64,037  | 36.7          | 60.3       |
| Always                                        | 69,514  | 35.6          | 57.1       |
| Catheter/ no urine output                     | 14,746  | 35.4          | 55.7       |
| Bowel incontinence: Always continent          | 85,461  | 39.3          | 56.6       |
| Occasionally                                  | 26,561  | 37.9          | 59.2       |
| Frequently                                    | 52,004  | 35.8          | 59.5       |
| Always                                        | 70,554  | 35.3          | 56.5       |
| Ostomy/ no bowel movement                     | 5,035   | 38.4          | 59.7       |

\*Missing Data for 11,127 residents.

Supplemental Table 2: Selected medications used by long stay residents with Chronic Obstructive Pulmonary Disease living in US nursing homes in 2018, stratified by Depression and Anxiety (N = 239,615).

| <b>Medications</b> | <b>Anxiety<br/>(n=89,083)</b> | <b>Depression<br/>(n=137,963)</b> | <b>Total<br/>(n=239,615)</b> |
|--------------------|-------------------------------|-----------------------------------|------------------------------|
| Antidepressants    |                               |                                   |                              |
| Used for 1-6 days  | 3.8                           | 4.5                               | 3.4                          |
| Used every day     | 71.2                          | 82.3                              | 57.4                         |
| Anxiolytics        |                               |                                   |                              |
| Used for 1-6 days  | 7.2                           | 3.9                               | 3.5                          |
| Used every day     | 47.6                          | 25.6                              | 20.7                         |
| Hypnotics          |                               |                                   |                              |
| Used for 1-6 days  | 1.0                           | 0.7                               | 0.7                          |
| Used every day     | 3.8                           | 3.1                               | 2.6                          |
| Antipsychotics     |                               |                                   |                              |
| Used for 1-6 days  | 1.8                           | 1.5                               | 1.4                          |
| Used every day     | 28.3                          | 22.8                              | 20.7                         |
| Opioids            |                               |                                   |                              |
| Used for 1-6 days  | 13.4                          | 12.5                              | 11.3                         |
| Used every day     | 28.9                          | 25.2                              | 21.8                         |

**Supplemental Figure 1. Sample selection flow chart of nursing home residents with chronic obstructive pulmonary disease**  
Non-SNF nursing home residents with Medicare with at least a quarterly assessment and 90+ days in nursing home (n = 1,107,904)

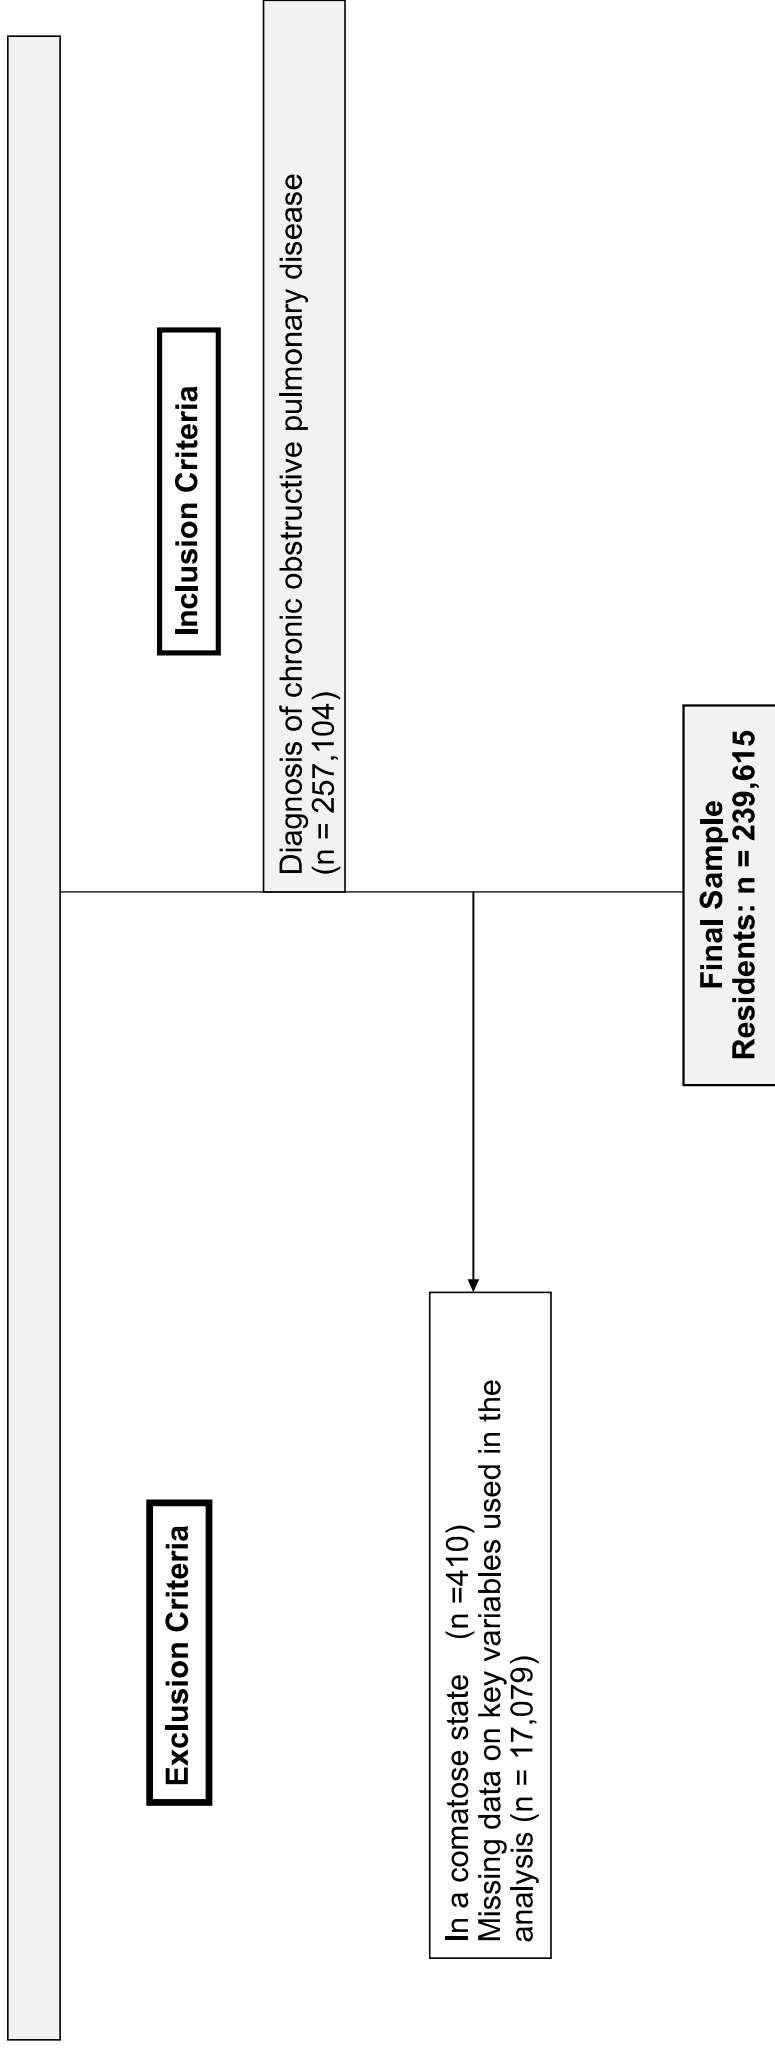

Supplement: Supplementary file 1 [file get_supplementary_file.php]
